# Supplementary material
Source: ML conference proceedings conference paper supplement (https://proceedings.neurips.cc/paper_files/paper/2016/hash/6ae07dcb33ec3b7c814df797cbda0f87-Abstract.html)
Supplement: Supplementary file [file 6ae07dcb33ec3b7c814df797cbda0f87-Supplemental.zip]

# Appendix: Ladder Variational Autoencoders

**Casper Kaae Sønderby\***  
casperkaae@gmail.com

**Tapani Raiko†**  
tapani.raiko@aalto.fi

**Lars Maaløe‡**  
larsma@dtu.dk

**Søren Kaae Sønderby\***  
skaaesonderby@gmail.com

**Ole Winther\*,‡**  
olwi@dtu.dk

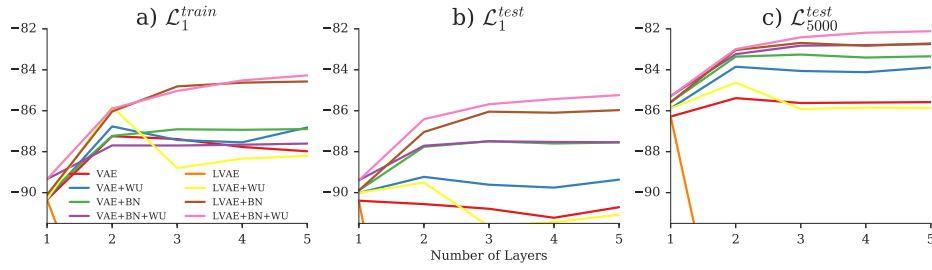

Figure 1: MNIST log-likelihood values for VAEs and the LVAE model with different number of latent layers, Batch normalization (BN) and Warm-up (WU). a) Train log-likelihood, b) test log-likelihood and c) test log-likelihood with 5000 importance samples. Note that the LVAE without batch normalization performed very poorly why some of the results fall outside the range of the plots

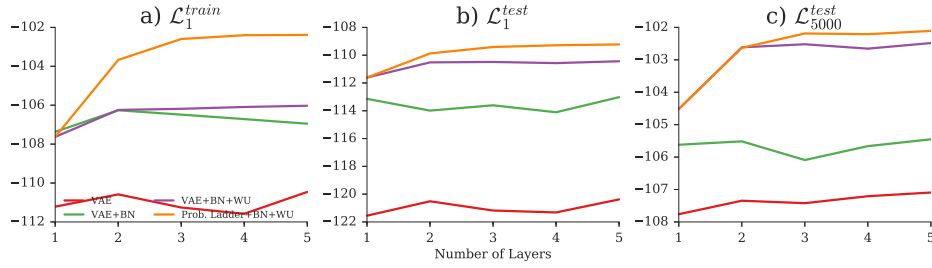

Figure 2: OMNIGLOT log-likelihood values for VAEs and the LVAE model with different number of latent layers, Batch normalization (BN) and Warm-up (WU). a) Train log-likelihood, b) test log-likelihood and c) test log-likelihood with 5000 importance samples

\*Bioinformatics Centre, Department of Biology, University of Copenhagen, Denmark

†Department of Computer Science, Aalto University, Finland

‡Department of Applied Mathematics and Computer Science, Technical University of Denmark

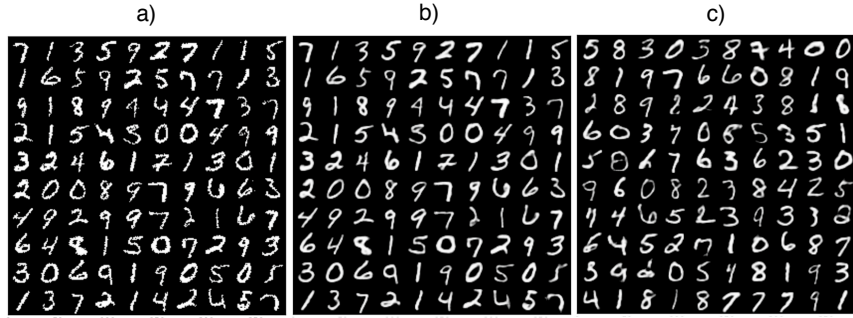

Figure 3: MNIST samples. a) True data, b) Conditional Reconstructions and c) Samples from the prior distribution

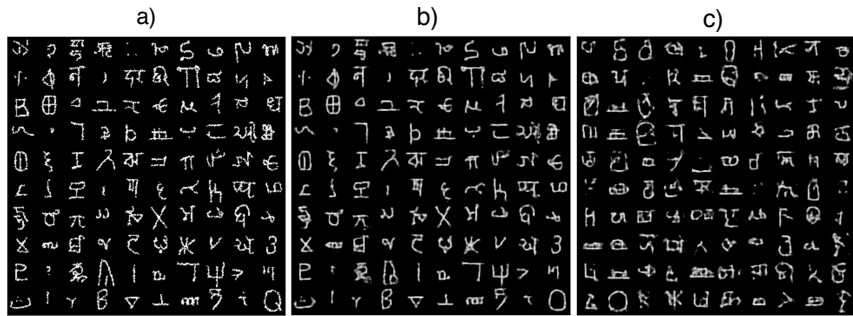

Figure 4: MNIST samples. a) True data, b) Conditional Reconstructions and c) Samples from the prior distribution
